# Supplementary material
Source: Springer Nature journal article supplement (https://www.springermedizin.de/resource/supplementary/12913_2012_2251_MOESM10_ESM.pdf/9530064)

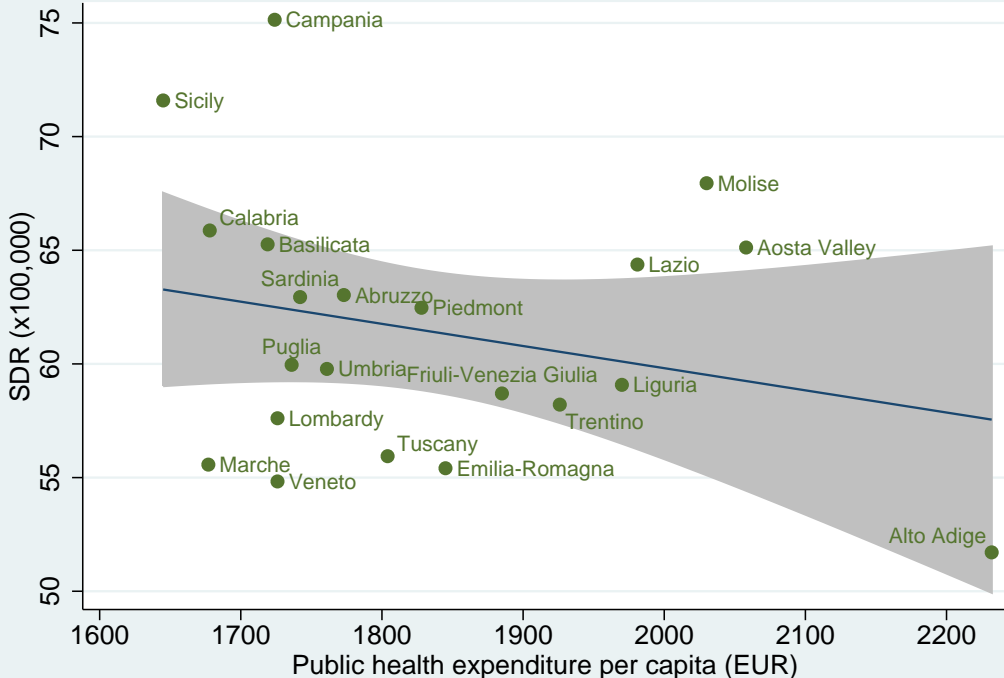

$r(p\text{-value})=-0.2539(0.2667)$

Supplement: MOESM10 [file 9530064]
